# Supplementary material for: Slowdown of Shirase Glacier caused by strengthening alongshore winds
Source: Copernicus journal article supplement (doi:10.5194/tc-2022-126), 2022-07-04
Supplement: Supplementary file 1 [file tc-2022-126-supplement.zip]

Archive with 4 entries (4 files):
- SupplementaryInformation/AnimationS1.gif
- SupplementaryInformation/AnimationS2.gif
- SupplementaryInformation/AnimationS3.gif
- SupplementaryInformation/SupplementaryInformation_TC.pdf
