# Supplementary material for: Slowdown of Shirase Glacier caused by strengthening alongshore winds
Source: Copernicus journal article supplement (doi:10.5194/tc-2022-126), 2022-07-04
Supplement: Supplementary file [file tc-2022-126-RC2-supplement.pdf]

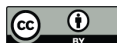

# 1 Slowdown of Shirase Glacier caused by strengthening alongshore winds

2

3 Bertie W.J. Miles<sup>\*1,2</sup>, Chris R. Stokes<sup>2</sup>, Adrian Jenkins<sup>3</sup>, Jim .R. Jordan<sup>3,4</sup>, Stewart .S.R. Jamieson<sup>2</sup>,  
 4 G. Hilmar. Gudmundsson<sup>3</sup>

5

6 <sup>1</sup>School of Geosciences, Edinburgh University, Edinburgh, EH8 9XP, UK

7 <sup>2</sup>Department of Geography, Durham University, Durham, DH1 3LE, UK

8 <sup>3</sup>Department of Geography and Environmental Sciences, Northumbria University, Newcastle upon  
 9 Tyne, NE1 8ST, UK

10 <sup>4</sup>Laboratoire de Glaciologie, Université Libre de Bruxelles, Brussels, Belgium

11 \*Correspondence to [Bertie.Miles@ed.ac.uk](mailto:Bertie.Miles@ed.ac.uk)

12

## 13 Abstract

14 Observations have confirmed basal melt rates of up to 16 m a<sup>-1</sup> underneath the Shirase ice tongue in  
 15 East Antarctica. These high basal melt rates are caused by intrusions of warm modified Circumpolar  
 16 Deep Water (mCDW) onto the continental shelf, a mechanism responsible for widespread mass loss  
 17 in West Antarctica, together with parts of Wilkes Land. In contrast to those regions, the catchment of  
 18 Shirase Glacier has been gaining mass, a trend attributed to increased precipitation. Here, we report  
 19 on the dynamical ocean-driven slowdown, thickening and grounding line advance of Shirase Glacier,  
 20 in response to strengthening easterly winds that reduce mCDW inflow and decrease basal melt rates.  
 21 Our findings are significant because they demonstrate that warm water regimes are not universally  
 22 associated with glacier acceleration and mass loss in Antarctica, and they highlight the overlooked  
 23 role of ocean forcing in the recent mass gain of the Dronning Maud Land sector.

24

## 25 1. Introduction

26 Shirase Glacier is the fastest flowing outlet glacier in East Antarctica, reaching speeds in excess of  
 27 2,200 m a<sup>-1</sup> across its grounding line, before flowing into Lützow-Holm Bay (Fig. 1). Its annual ice  
 28 discharge approaches 15 Gt a<sup>-1</sup> (Rignot et al., 2019) and it drains a catchment containing 1.2 m of sea  
 29 level equivalent (Fig.1, Morlighem et al., 2020). This rapid ice flow speed is associated with vigorous

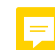

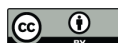

30 melt underneath its floating tongue, where basal melt rates have been observed to vary seasonally  
 31 between 7 and 16 m a<sup>-1</sup> in 2018, 16 km downstream of the glacier's grounding line (Hirano et al.,  
 32 2020). These high melt rates are caused by warm modified Circumpolar Deep Water (mCDW)  
 33 intruding onto the continental shelf and being transported directly to the glacier via bathymetric  
 34 troughs (Fig. 1; Moriwaki & Yoshida, 1983; Hirano et al., 2020), a process referred to as Mode 2  
 35 melting (Jacobs et al., 1992). Elsewhere in Antarctica, most regions that experience this mode of  
 36 oceanic melt have been losing mass, as enhanced melt has thinned ice shelves, causing glacier  
 37 acceleration and mass loss e.g. the Amundsen Sea (Jenkins et al., 2018; Mouginit et al., 2014), the  
 38 Western Antarctic Peninsula (Cook et al., 2016) and Wilkes Land (Rintoul et al., 2016; Greene et al.,  
 39 2017). However, mass loss has not been observed at Shirase Glacier and, between 2003 and 2019, its  
 40 wider catchment (sometimes referred to as drainage basin 7) gained mass at a rate of  $+25 \pm 6$  Gt a<sup>-1</sup>,  
 41 which is the largest imbalance of all drainage basins in East Antarctica (Smith et al., 2020), including  
 42 the comparatively well studied Wilkes Land (drainage basin 13;  $-20 \pm 14$  Gt a<sup>-1</sup>).

43 The mass gain and thickening in the Shirase catchment over the past two decades has been  
 44 hypothesized to have been caused by increased precipitation (Schröder et al., 2019; Smith et al., 2020)  
 45 from extreme snowfall events within the wider region (Boening et al., 2012; Lenaerts et al., 2013).  
 46 Although, earlier field-based estimates, using repeat triangulation surveys in 1969 and 1973,  
 47 demonstrated ice surface lowering of around 0.7 m a<sup>-1</sup> around 100-200 km inland of the Shirase  
 48 Glacier grounding line (Mae & Naruse, 1978; Naruse, 1979; Nishio et al., 1989). Furthermore, repeat  
 49 GPS surveys in 1980 and 1988 revealed a thinning rate of around 0.5 m a<sup>-1</sup> 100-150 km inland of the  
 50 grounding line (Toh et al., 1992). These rates of surface lowering during that time are comparable  
 51 with some of the fastest rates of thinning observed across Antarctica over the past decade at similar  
 52 distances inland of the grounding line (Smith et al., 2020). This surface lowering may have a much  
 53 longer-term signal with ice core records estimating a surface lowering of 350 m over the past 2000  
 54 years of the Mizuho Plateau (Kameda et al., 1990), which is located around 200 km inland of the  
 55 Shirase coastline. The surface lowering over the past 2000 years is coincident with an increase in ice  
 56 discharge from the Lützow-Holm Bay, which has been estimated from subglacial erosion rates  
 57 (Sproson et al., 2021).

58 Oceanographic observations in Lützow-Holm Bay in 2018 have revealed a two-layered structure with  
 59 a cool and relatively fresh layer of Winter Water overlying a warm and saline mCDW layer, where  
 60 temperatures near the ice front seasonally exceed the *in situ* melting point by 2.7 °C (Hirano et al.,  
 61 2020). Observations and modelling demonstrate a strong seasonal variation in the basal melt rate of  
 62 the Shirase ice tongue (Hirano et al., 2020; Kusahara et al., 2021), which is caused by seasonal  
 63 variations in the depth of the thermocline forced by the strength of the alongshore easterly winds near



64 the continental shelf (Ohshima et al., 1996). There is **no evidence** of large seasonal variations in ice  
 65 flow speed at the grounding line, but observations do show some seasonal variation in ice flow speed  
 66 on the floating tongue that could be connected to external forcing (Nakamura et al., 2007; 2010).

67 There have been several studies analysing the ice flow dynamics of the Shirase Glacier, largely  
 68 covering short sub-decadal time periods (Pattyn & Derauw, 2002; Pattyn & Naruse, 2003; Nakamura  
 69 et al., 2010; Aoyama et al., 2013). However, the longer-term geological signal of ice sheet thinning  
 70 and increased ice discharge, along with observations of thinning in the 1970s and 1980s, followed by  
 71 thickening from the 2000s raise some important questions into the processes causing this switch. In  
 72 this study, we produce a time series of ice flow speed that spans 47 years and show that long-term ice  
 73 speed trends coincide with alongshore wind speeds. We then discuss how these observations may  
 74 relate to wider hemispheric trends in atmospheric circulation and what this may mean for the future  
 75 mass balance of the Shirase catchment and the wider Dronning Maud Land sector.

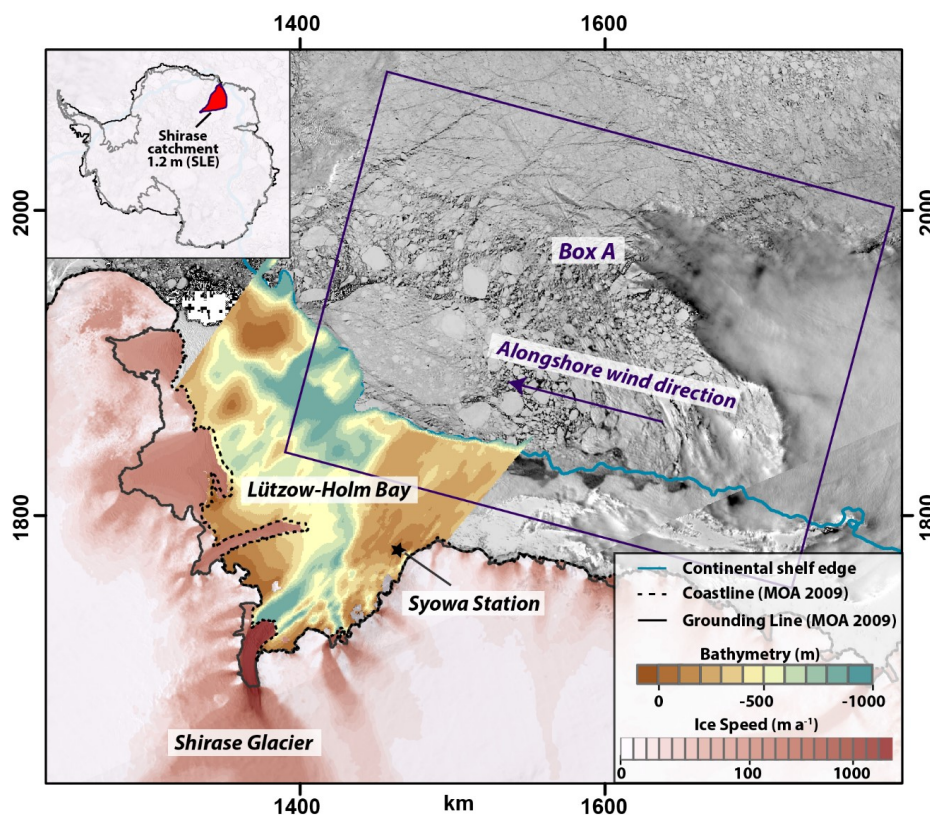

76

77 **Figure 1:** MODIS image of Lützow-Holm Bay and Shirase Glacier from the 4<sup>th</sup> November 2019  
 78 obtained from NASA WorldView. Overlain is the ITS\_LIVE composite velocity product in  
 79 logarithmic scale (Gardner et al., 2018; 2020), the MODIS 2009 grounding line and coastline (black  
 80 line; Scambos et al., 2007; Harran et al., 2019), 1000 m bathymetric contour obtained from



81 BedMachine (Morlighem et al., 2020) which is taken as the continental shelf boundary and  
 82 bathymetry of the Lützow-Holm Bay (Kusahara et al., 2021). Note the deep trough connecting Shirase  
 83 Glacier to the open ocean. The location of the Syowa research station and Box A, the region where  
 84 ERA5 derived winds were extracted are also shown. The ~~coordinate~~ grid is in km and it is projected  
 85 in Polar Stereographic.

86

## 87 2. Data and Methods

### 88 2.1 Ice-front position, ice speed, grounding line and ice thickness

89 We create a time series of ice-front positions between 1963 and 2020 using a variety of different  
 90 sources including: ARGON imagery from 1963, Landsat-1 imagery from 1973, Landsat-5 imagery  
 91 from 1984, Landsat-4 imagery from 1988, RADARSAT RAMP mosaic from 1997 (Jezek et al.,  
 92 2013), and MODIS imagery from 2000-2020, with the spatial resolution of the satellite data ranging  
 93 from 15-250 m. In each case, we map the outer limit of the collection of loosely bound icebergs that  
 94 form the Shirase ice tongue that are typically surrounded by a smoother surface of fast ice (Fig. 1 &  
 95 2a). Errors associated with this mapping are insignificant in the context of the ice tongue typically  
 96 advancing  $2,500 \text{ m a}^{-1}$ , or retreating in short-lived calving events typically  $>10 \text{ km}$ .

97 We calculate 18 ice speed estimates for Shirase Glacier between 1973 and 2020. For 1973 we use a  
 98 pair of Landsat-1 (band 7) images from the 25<sup>th</sup> January 1973 and the 21<sup>st</sup> January 1974 that we  
 99 manually co-register to each other, before co-registering to a Landsat-8 image. The combination of  
 100 the relatively coarse Landsat-1 imagery (60 m) and the development of surface melt ponding over the  
 101 fast flowing section of the glaciers between the two images prevented the automatic extraction of ice  
 102 speed. Instead, we extract an ice speed estimate by manually tracking the displacement of a prominent  
 103 rift  $\sim 24 \text{ km}$  downstream of the grounding line (Fig. 2c). Errors associated with the manual tracking  
 104 of this rift stem from the co-registration between the two image pairs which we estimate to be one  
 105 pixel (60 m; Animation S1). For 1988, we use a pair of Landsat-4 (band 3) images from the 14<sup>th</sup>  
 106 January 1988 and the 15<sup>th</sup> February 1988 that we also co-register to a Landsat-8 image. The quality  
 107 of the Landsat-5 images (30 m resolution) is superior to that of the Landsat-1 imagery and, in the  
 108 absence of significant surface melt ponding, we use the feature tracking software COSI-CORR  
 109 (Leprince et al., 2007; Scherler et al., 2008) to extract ice speed. For these images co-registration  
 110 error is negligible (Animation S2) and error in the feature tracking is estimated at  $<0.5$  pixels (e.g.  
 111 Heid and Kääb, 2012), because of the close time separation of the image pairs this results in a larger  
 112 error of  $\pm 171 \text{ m a}^{-1}$ . For 2000-2018 we use 14 annual ice speed mosaics from the ITS\_LIVE dataset  
 113 which cover Shirase Glacier (Gardner et al., 2018) and use the corresponding error grids for error  
 114 values, which range from 1 to  $32 \text{ m a}^{-1}$ . For 2019 ( $n=27$ ) and 2020 ( $n=19$ ) we take an average for all

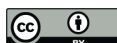

GoLIVE generated ice speed fields (Fahnestock et al., 2016; Scambos et al., 2016) with a time separation of 16-320 days from scene ID's 149\_109 and 150\_109. Taking an average of multiple ice speed grids reduces error and, as such, we prescribe a nominal error of  $16 \text{ m a}^{-1}$ . We extract ice speed profiles from each time period across a transect, T1 (Fig. 2a), and also produce a time-series of ice speed change where T1 crosses the grounding line. In 1973, the only possible observation of ice speed was extracted 24 km downstream of the grounding line (Point x; Fig. 2a) and there are no observations directly at the grounding line. To account for this, we estimate ice speed at the grounding line in 1973 using the average difference between point x, 24 km downstream of the grounding line, and where T1 crosses the grounding line in each of the other 17 ice speed profiles (1988-2020). Across these profiles, ice speed was on average 2% slower (ranging from 1% to 4%) at the grounding line, compared to ice speed at point x. Therefore, to estimate ice speed at the grounding line in 1973 we reduce the ice speed observed 24 km downstream of the grounding line by  $2 \pm 1\%$ . We also include the measurements of ice speed from Nakamura et al. (2007) at the grounding line derived from the JERS-1 satellite in 1996, 1997 and 1998.

To estimate the direction and magnitude of any migration in the Shirase Glacier grounding line we compare time stamped digital elevation model (DEM) strips with a spatial resolution of 2 m from the 6<sup>th</sup> January 2013 and the 8<sup>th</sup> October 2015 from the REMA project (Howat et al., 2019). We select these strips because they cover the complete Shirase Glacier grounding line and represent the longest time gap in the record. This is in addition to a SPOT5-HRS DEM from the SPIRIT project (Korona et al., 2009) from the 8<sup>th</sup> February 2008, with a spatial resolution of 40 m. Elevation uncertainty is estimated at around 4 m by comparing derived elevations from exposed bedrock between the two REMA DEM's and a larger uncertainty of around 7 m between the SPOT5-HRS and REMA DEM's. The tidal amplitude of the region is limited to 0.2 m (Aoki et al., 2000) and is deemed insignificant. We extract elevation profiles along transect T1 (Fig. 2a) from these dates. A comparison of elevation profiles cannot provide a location of the true grounding line position, but any horizontal migration of these elevation slopes can provide reasonable estimates in both the direction and rate of grounding line migration (Fricker et al., 2009; Brunt et al., 2010).

We also extract an ice thickness change time-series from the dataset presented in Schröder et al. (2019) from point IT, which is around 20 km inland of the grounding line (Fig. 2a). This multi-mission dataset spans between 1978 and 2017 and contains data from a variety of satellites. We use the accompanying uncertainty estimates described in Schröder et al. (2019). We also utilize modelled melt rate anomalies of the Shirase ice tongue that are derived by an ocean model that is forced by ERA5 wind reanalysis between 2008 and 2018 by Kusahara et al. (2021). The melt rate dataset contains melt anomalies that have been simulated with and without fast ice cover, we use the melt



149 rates with fast ice cover, but note that there is little difference between the two melt rate datasets (see  
 150 Fig. 20; Kusahara et al., 2021)

151

## 152 2.2 Climatological data

153 We extract mean monthly ERA5 (Hersbach et al., 2020) 10 m zonal (U) and meridional winds (V)  
 154 speeds with a gridded 30 km spatial resolution between 1979 and 2020 from an approximately 340 x  
 155 250 km box adjacent to the coastline (Box A; Fig. 1). We do not extend the box all the way into  
 156 Lützow-Holm Bay because it is semi-permanently covered with landfast sea-ice (Fig. S1) that  
 157 dampens the impact of winds on ocean circulation. We also utilize an observational wind direction  
 158 and wind speed time-series (1966-2020) from the Syowa research station (See Fig.1) that is available  
 159 via the SCAR Met READER (Turner et al., 2004). We then calculate alongshore easterly wind speed  
 160 for both the ERA5 reanalysis data extracted from Box A and the observational time-series from  
 161 Syowa research station, using an alongshore angle of 80° from due north:

$$162 \quad A = W \cos(\theta - 80)$$

163 Where  $W$  is wind speed and  $\theta$  is wind direction. Some differences between the ERA5 and  
 164 observational record from Syowa are expected because the ERA5 record represents an average from  
 165 a much larger region, while the observational data from Syowa research station are from a single  
 166 spatial location.

167

## 168 3. Results

169 We observe a total range of nearly 90 km in the ice-front position of the Shirase ice tongue between  
 170 1963 and 2020. Its maximum extent was in 1963, before retreating to its minimum extent in 1988  
 171 (Fig. 2a, b). Since 1988 there has been a general pattern of advance with a few sporadic calving events  
 172 (Fig. 2a, b). Most of the variation in the extent of the Shirase ice tongue is in the heavily fractured  
 173 and unconstrained section of the floating ice tongue. The only exception to this was in 1988 when the  
 174 ice tongue retreated to the entrance of the narrow and more constrained section of its fjord, 24 km  
 175 advanced of its 2009 grounding line (Fig. 2a).



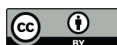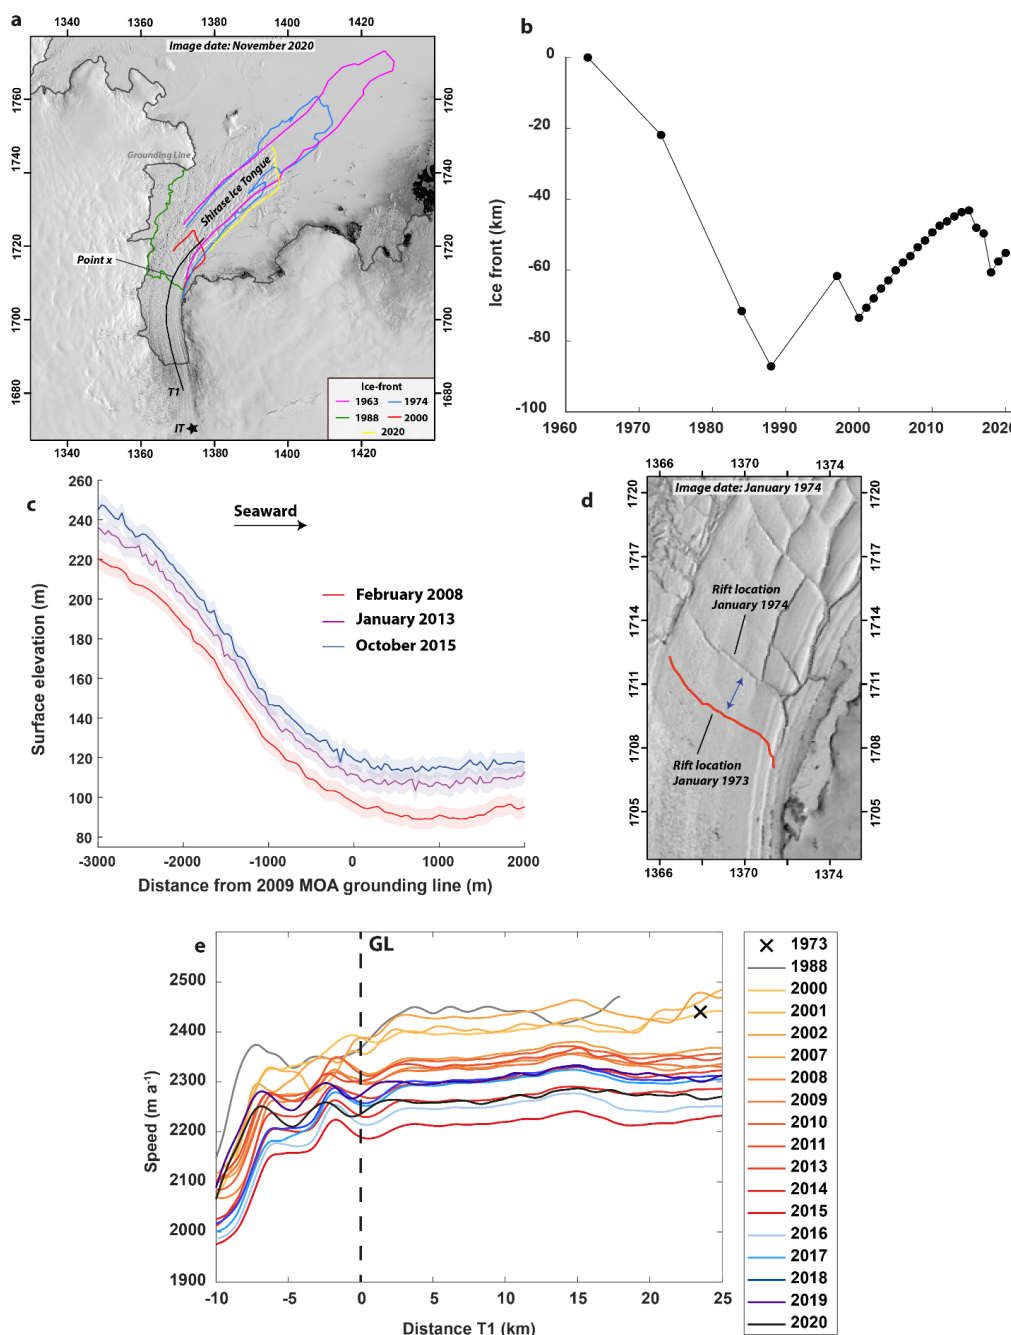

176

177 **Figure 2:** a) Landsat-8 image from November 2020 showing the Shirase ice tongue. Overlain are  
 178 selected ice-front positions from 1963, 1974, 1988, 2000 and 2020; along with the transect, T1, used  
 179 to extract ice speed profiles and point x, which is the location of the 1973/74 ice speed estimate on  
 180 the floating tongue. Point IT is the location of the ice thickness time-series. The grey line is the  
 181 MODIS 2009 grounding line (Scambos et al., 2007, Harran et al., 2021). The coordinate grid is in



182 km. **b)** Change in ice-front extent relative to 1963. **c)** Surface elevation profiles along a small section  
 183 of T1 as it intersects the grounding line from February 2008, January 2013 and October 2015 showing  
 184 a seaward migration of the surface slope d) The rift used to estimate ice speed in 1973/74. The red  
 185 line is the digitized rift from January 1973. **e)** Ice speed profiles from transect T1 between 1973 and  
 186 2020. The black cross represents the ice speed measurement from 1973/74. Landsat images are  
 187 courtesy of the U.S. Geological Survey.

188

189 Ice speed profiles along the transect (T1, Fig. 2a) show a uniform pattern of change across both the  
 190 grounded and floating sections of Shirase Glacier (Fig. 2e). At the grounding line, we observe little  
 191 change in ice speed between 1973 and 1988, although we note the larger uncertainty in the 1988  
 192 estimate of  $\pm 171 \text{ m a}^{-1}$  (Fig. 3b). Between 1988 and 1996 we observe a  $2 \pm 7\%$  slowdown and a  $2 \pm 1\%$   
 193 increase in ice speed between 1997 and 2000 (Fig. 3a). Post-2000 we observe a slowdown, with an  $8$   
 194  $\pm 1\%$  decrease in ice speed between 2000 and 2015 (Fig. 3b). Between 2015 and 2019 ice speed  
 195 increased by  $4 \pm 1\%$  (Fig. 3a). Elevation profiles along a section of T1 in 2008, 2013 and 2015 show  
 196 a seaward migration of the surface slope as it approaches the grounding line (Fig. 2d), which is  
 197 indicative of grounding line advance and can be visualised in animation S3. Between February 2008  
 198 and October 2015 we estimate that the grounding line has advanced around 400 m ( $\sim 50 \text{ m yr}^{-1}$ ) from  
 199 measuring the seaward displacement of the surface slope, an estimate that is consistent with CryoSat  
 200 based observations of seaward grounding line migration between 2010 and 2016 ( $\sim 30 \text{ m a}^{-1}$ ; Konrad  
 201 et al., 2018). Observations of ice thickness change 20 km inland of the grounding line show a thinning  
 202 trend of  $0.27 \pm 0.33 \text{ m a}^{-1}$  between 1987 and 1997, before reversing to a thickening trend of  $0.19 \pm 0.10$   
 203  $\text{m a}^{-1}$  between 1997 and 2017 (Fig. 3b).

204 ERA5 derived estimates of alongshore wind speed between 1979 and 2020 show limited variation  
 205 between 1984 and the early 1990s (Fig. 3a). In the early 1990s there was a small increase in  
 206 alongshore wind speed, before a much more marked increase from 2000-2010 where alongshore wind  
 207 speed increased from around  $4 \text{ m s}^{-1}$  to  $4.8 \text{ m s}^{-1}$  (Fig. 3a). This is before falling slightly to around  $4.5$   
 208  $\text{m s}^{-1}$  between 2010 and 2018, which is coincident with an increase in basal melt rate anomalies (Fig.  
 209 3a). Long-term increased alongshore wind speeds at the Syowa research station in Lützow-Holm Bay  
 210 between 1966 and 2020 are also observed with a small peak in alongshore wind speeds in the early  
 211 1990s before a sharp increase in along shore wind speed between the late 1990s and 2005 (Fig. S2).  
 212 However, the observational record at Syowa also records a peak in alongshore wind speed in the early  
 213 1980s (Fig. S2) that is not present in the ERA5 offshore reanalysis record (Fig. 3a).



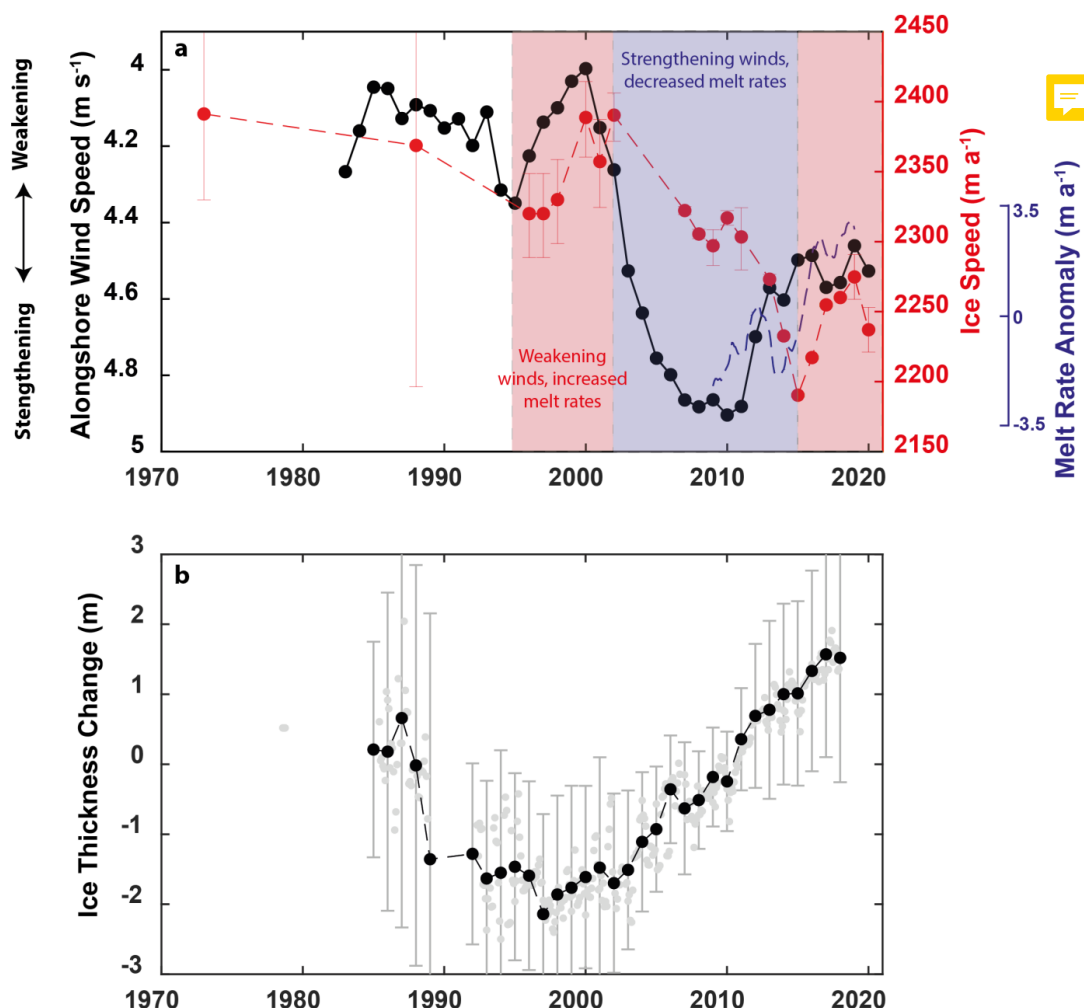

**Figure 3: a)** Annually averaged ERA5 derived alongshore wind speed from Box A (See Fig. 1) and plotted as a 5-year rolling mean (black), ice speed at the Shirase Glacier grounding line along T1 (red) and modelled melt rate anomaly of the Shirase ice tongue between 2008 and 2018 (blue; Kusahara et al., 2021). Periods of weakening winds cause increased mCDW transport, increased basal melt and acceleration. Periods of strengthening winds result in relatively less mCDW transport, decreased basal melt rates and glacier slowdown. Note that alongshore wind speed is plotted with an inverted axis. **b)** Annually averaged ice thickness change at point IT (see Fig. 2a) extracted from the Schröder et al. (2019) dataset, where there are at least 6 data points in the calendar year. The error bars are annually averaged errors. The background grey points are the raw monthly data points.

## 4. Discussion

### 4.1 Slowdown and thickening caused by strengthening alongshore winds



228 Theoretical considerations indicate that the heavily fractured and unconstrained section of the Shirase  
 229 ice tongue offers little buttressing force (Fürst et al., 2016). Therefore, it is unlikely that any variations  
 230 in the extent of the Shirase ice tongue have had a direct effect on the ice speed trends we have  
 231 observed (Fig. 4a). The only exception to this is in 1988 where the ice tongue briefly retreated to the  
 232 edge of its more confined embayment (Fig. 2a), closer to where the extent of the ice tongue might be  
 233 expected to exert buttressing and impact on inland flow speed, were it to be removed (Fig. 4a).

234

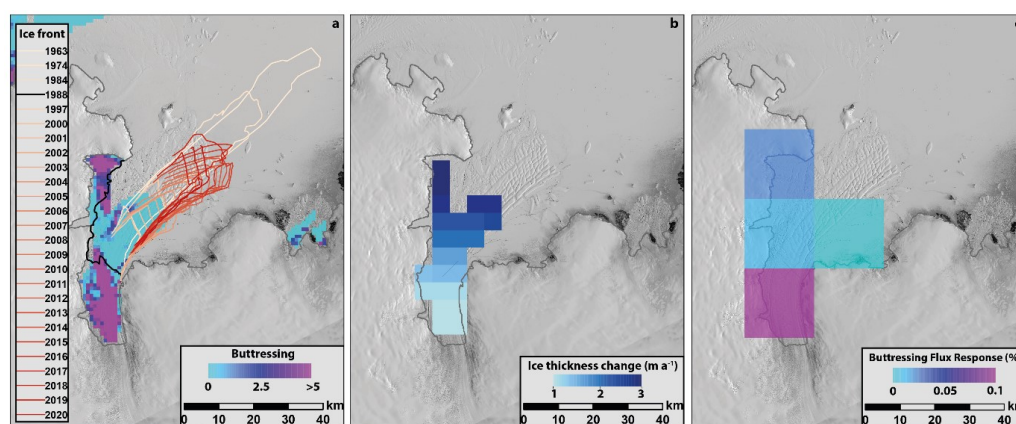

235

236 **Figure 4:** No change in ice tongue buttressing in response to observed changes in ice tongue extent,  
 237 but increased buttressing expected in response to observed ice tongue thickening. **a)** Simulated  
 238 maximum buttressing potential of the Shirase ice tongue (Durand et al., 2016). Light blues mean the  
 239 ice is passive, purples mean the floating ice is dynamically important. No **dynamically important** ice  
 240 has calved ~~over the past~~ over the past 57 years. **b)** Ice tongue thickness change between 2003 and  
 241 2019 showing thickening of the Shirase ice tongue (Smith et al., 2020). **c)** Simulated response of ice  
 242 flux to thinning of floating ice in each grid cell by 1 m (Reese et al., 2018), floating ice near the  
 243 grounding line is important for buttressing.

244

245 In agreement with previous work, we note that the observed fluctuations in ice tongue extent are  
 246 correlated with landfast sea-ice conditions in Lützow-Holm Bay (Aoki, 2017). Long periods of ice  
 247 tongue advance are associated with persistent landfast sea-ice in Lützow-Holm Bay, while ice tongue  
 248 retreat is associated with landfast sea-ice break-out events removing parts of the ice tongue  
 249 conglomerate (Aoki et al., 2017). It is unlikely that the fast ice has any major role in providing  
 250 buttressing for Shirase Glacier. **We note that there was no obvious spike in ice speeds on the**  
 251 **grounding line or ice tongue in 1988 when the fast ice was completely removed from the bay** (Fig.  
 252 2a, S3) and that Nakamura et al. (2010) recorded only a very modest  $20 \pm 30 \text{ m a}^{-1}$  ( $0.8 \pm 1.3 \%$ )  
 253 change in ice speed at the grounding line after a partial fast ice break-out event in 1998.



Point IT, 20 km inland of the Shirase Glacier grounding line was thinning at a rate of  $-0.27 \pm 0.33 \text{ m a}^{-1}$  between 1987 and 1997 (Fig. 3c), a pattern consistent with field observations up to 200 km further inland in the 1960s, 1970s and 1980s (Mae and Naruse, 1978; Naruse, 1979; Nisho et al., 1989; Toh and Shibuya, 1992). However, at  $\sim 2000$  there was a slowdown in Shirase Glacier (Fig. 3a) and this thinning trend reversed to thickening (Fig. 3b). This slowdown and thickening coincides with an increase in alongshore wind speed adjacent to the Shirase coastline (Fig. 3a). The seasonal strengthening in alongshore winds offshore of the Shirase coastline has been observed to deepen the thermocline in Lützow-Holm Bay, limiting the inflow of mCDW onto the continental shelf and reduce basal melt rates (Hirano et al., 2020). We suggest that this same process over annual to decadal timescales has caused the slowdown of Shirase Glacier.

Increased alongshore wind speed from  $\sim 2000$  enhanced Ekman convergence at the coast, deepening the thermocline with a short lag and inhibited the inflow of warm mCDW into Lützow-Holm Bay. The subsequent cooling of Lützow-Holm Bay reduced the basal melt rate of the Shirase ice tongue. This reduction in basal melt caused the ice tongue to dynamically thicken and is confirmed by ICESat and ICESat-2 observations of the Shirase ice tongue that show a mean thickening of  $1.87 \text{ m yr}^{-1}$  from 2003-2019 (Fig. 4b; Smith et al., 2020). The dynamic thickening of the ice tongue increases buttressing through time (Reese et al., 2018; Fig. 4c) and ultimately drives the overall slowdown in ice speed, grounding line advance and inland thickening that we observe. Importantly, our results show that wind-driven ocean forcing is also contributing to the mass gain in the Dronning Maud Land regions in addition to surface mass balance processes (Boening et al., 2012; Lenaerts et al., 2013).

Within the longer term slowdown of Shirase Glacier between 1973 and 2020 we observe brief periods of acceleration in response to short-lived periods of weakening alongshore winds. For example, both of the accelerations in ice speed from 1997-2000 and 2015-2019 are preceded by brief periods of weakening alongshore winds (Fig. 3a). These periods of weakening alongshore winds cause relatively higher basal melt rates because they raise the thermocline closer to the ocean surface and enable a greater influx of mCDW into Lützow-Holm Bay (Hirano et al., 2020). For 2015-2019, this is supported by increasingly higher modelled melt rate anomalies (Fig. 3a). Because we observe coincidental acceleration in ice speed during this period of increased melt rates, it is indicative of a reduction in buttressing in response to ice tongue thinning. The interannual variability in ice flow speed at Shirase Glacier in response to wind-forced ocean variability is analogous to other regions of Antarctica where mCDW periodically floods the continental shelf e.g. Pine Island (Christianson et al., 2016), Thwaites (Miles et al., 2020) and Totten Glaciers (Greene et al., 2017). Although, the pattern of change at Shirase Glacier is unique because it is the only outlet glacier in Antarctica with a warm water regime, that has been observed to be slowing down and thickening during the 21<sup>st</sup>



288 century, as opposed to accelerating and thinning (e.g. Mouginot et al., 2014; Greene et al., 2017).  
 289 Therefore, this result highlights that this oceanic mode of ice melt is not universally associated with  
 290 mass loss in Antarctica.

291

## 292 **4.2 Wider links to climate forcing and future implications**

293 In response to both increased greenhouse gas emissions and ozone depletion (Thompson et al., 2011;  
 294 Wang et al., 2014; Perren et al., 2020) the band of mid-latitude westerly winds that encircle Antarctica  
 295 have both strengthened and migrated southwards towards the ice sheet over recent decades  
 296 (Thompson & Solomon, 2002; Marshall, 2003; Turner, 2005; Bracegirdle et al., 2018). In the  
 297 Amundsen Sea sector this anthropogenic driven migration has been linked to westerly wind anomalies  
 298 over the continental shelf (Holland et al., 2019), which have enabled a greater influx of warm mCDW  
 299 onto the continental shelf and have driven enhanced localized ice sheet mass loss (Thoma et al., 2008).  
 300 At Shirase Glacier, our observations of strengthening alongshore easterly winds suggest any  
 301 southward encroachment of the mid-latitude westerlies has yet to impact the Shirase coastline. This  
 302 may also be the case for parts of the wider Dronning Maud Land coastlines where alongshore  
 303 easterlies have also been observed to have strengthened (Hazel & Stewart, 2019). This trend in  
 304 strengthening alongshore easterlies is linked to enhanced katabatic winds as low pressure systems  
 305 track progressively further south and enhance the pole to coast pressure gradient (Hazel & Stewart,  
 306 2019). It remains undetermined if the enhancement of the pole to coast pressure gradient has been  
 307 influenced by the anthropogenically driven southerly migration of the mid-latitude westerlies, or if it  
 308 has been caused by inherent natural decadal variability within the system.

309 Over the course of the 21<sup>st</sup> century, the southerly migration of the mid-latitude westerlies is projected  
 310 to continue in line with a warming climate (Yin, 2005; Perren et al., 2020). Along the Shirase  
 311 coastline, it remains unclear if this continued southerly migration will ultimately result in a similar  
 312 situation to the Amundsen Sea, such that westerly wind anomalies offshore would result in enhanced  
 313 mCDW transport into Lützow-Holm Bay and cause mass loss. Alternatively, the westerly winds may  
 314 never migrate close enough to the Shirase coastline to impact alongshore winds, and instead,  
 315 alongshore winds may continue to strengthen as the pole to coast pressure gradient increases. This  
 316 would result in further cooling of Lützow-Holm Bay and ice tongue thickening, and further mass  
 317 gain. In a wider context a greater understanding of the potential changes in ocean forcing in response  
 318 to broader atmospheric patterns expected over the coming decades is needed in the Dronning Maud  
 319 Land sector.

320



## 321 5. Conclusion

322 Our observations of Shirase Glacier are a rare example of a glacier reversing a trend of mass loss  
 323 from at least the 1970s-1990s to mass gain over the last two decades. As far as we are aware this is  
 324 the only major fast flowing Antarctic outler glacier to display this pattern of behaviour. This reversal  
 325 has been driven by a slowdown of the Shirase Glacier upstream of the grounding line in response to  
 326 strengthening alongshore winds that have limited the inflow of warm mCDW into Lützow-Holm Bay,  
 327 reduced basal melt rates and caused its ice tongue to dynamically thicken. This means that ocean  
 328 forcing has contributed to some of the observed mass gain in Dronning Maud Land. It is not certain  
 329 if these strengthening alongshore winds represent some form of inherent decadal-scale variability or  
 330 if they are part of a multi-decadal trend, but we hypothesise that they are at least consistent with an  
 331 anthropogenically-driven poleward migration of the mid-latitude westerly winds. Should this  
 332 strengthening of alongshore easterly winds continue into the future, the Shirase catchment will  
 333 continue to experience a positive mass balance due to both the slow-down in ice discharge, and to the  
 334 predicted increase in precipitation in response to atmospheric warming (e.g. Ligtenberg et al., 2013;  
 335 Kittel et al., 2021). Our results highlight the need for a greater consideration in the potential role of  
 336 ocean forcing in both the current and future mass balance of the wider Dronning Maud Land region.

337

338

## 339 Data Availability

340 Landsat and ARGON imagery was provided free of charge by the US Geological Survey Earth  
 341 Resources Observation Science Center (<https://earthexplorer.usgs.gov/>). For the MODIS imagery we  
 342 also acknowledge the use of imagery from the NASA Worldview application  
 343 (<https://worldview.earthdata.nasa.gov/>), part of the NASA Earth Observing System Data and  
 344 Information System (EOSDIS). Cosei-corr is an ENVI plug-in and can be downloaded from  
 345 [http://www.tectonics.caltech.edu/slip\\_history/spot\\_coseis/download\\_software.html](http://www.tectonics.caltech.edu/slip_history/spot_coseis/download_software.html). The ITS\_LIVE  
 346 velocity products are available from <https://doi.org/10.5067/IMR9D3PEI28U>. GoLIVE velocity  
 347 products are available from <http://dx.doi.org/10.7265/N5ZP442B>. ERA5 data is available from  
 348 <https://doi.org/10.24381/cds.adbb2d47>. Wind data from Syowa station is available via the SCAR  
 349 READER at <http://dx.doi.org/10.5285/569d53fb-9b90-47a6-b3ca-26306e696706>. The MOA  
 350 grounding line product is available at <https://doi.org/10.7265/N5KP8037>. BedMachine is available at  
 351 <https://doi.org/10.5067/E1QL9HFQ7A8M>. The ice shelf thickness change dataset from Smith et al.  
 352 (2020) is available at <http://hdl.handle.net/1773/45388>. REMA DEM strips are available at  
 353 <https://www.pgc.umn.edu/data/rema/>. Lützow-Holm Bay bathymetry is available at



354 <https://doi.org/10.17632/z6w4xd6s3s.1>. The RAMP mosaic is available at <https://doi.org/10.5>  
355 [067/8AF4ZRPULS4H](https://doi.org/10.5067/FWHORAYVZCE7). Ice shelf extent buttressing dataset from Durand et al., 2016 is available at  
356 <https://doi.org/10.5067/FWHORAYVZCE7>. SPIRIT DEM's are available from  
357 <https://theia.cnes.fr/atdistrib/rocket/#/search?collection=Spirit>

358

### 359 Acknowledgements

360 This research has been supported by a UK Natural Environment Research Council (NERC) grant  
361 (NE/R000824/1). BM was also supported by a Leverhulme Early Career Fellowship (ECF-2021-  
362 484). Hersbach, H. et al.'s (2018) dataset was downloaded from the Copernicus Climate Change  
363 Service (C3S) Climate Data Store. We acknowledge the DEMs provided by the Byrd Polar and  
364 Climate Research Center and the Polar Geospatial Center under NSF-OPP awards 1543501, 1810976,  
365 1542736, 1559691, 1043681, 1541332, 0753663, 1548562, 1238993 and NASA award  
366 NNX10AN61G. Computer time provided through a Blue Waters Innovation Initiative. DEMs  
367 produced using data from Maxar. We thank Ronja Reese for providing the ice flux buttressing  
368 response dataset.

369

370 **Author contributions:** All authors contributed to the design of the study. BWJM collected and  
371 analysed the remote sensing data and led the manuscript writing with input from all authors.

372

373 **Competing interests:** The authors declare no competing interests

374

375

376

377

378

379

380

381

382

383





384

## 385 **References**

- 386 Aoki, S., Ozawa, T. & Doi, K. (2000). GPS observation of the sea level variation in Lützow-Holm  
 387 Bay, Antarctica. *Geophysical Research Letters*, 27(15), 2285–2288.  
 388 <https://doi.org/10.1029/1999GL011304>
- 389 Aoki, S. (2017). Breakup of land-fast sea ice in Lützow-Holm Bay, East Antarctica, and its  
 390 teleconnection to tropical Pacific sea surface temperatures. *Geophysical Research Letters*,  
 391 44(7), 3219–3227. <https://doi.org/10.1002/2017GL072835>
- 392 Aoyama, Y., Doi, K., Shibuya, K., Ohta, H., & Tsuwa, I. (2013). Near real-time monitoring of flow  
 393 velocity and direction in the floating ice tongue of the Shirase Glacier using low-cost GPS  
 394 buoys. *Earth, Planets and Space*, 65(2), 103–108. <https://doi.org/10.5047/EPS.2012.06.011>
- 395 Boening, C., Lebsack, M., Landerer, F., & Stephens, G. (2012). Snowfall-driven mass change on  
 396 the East Antarctic ice sheet. *Geophysical Research Letters*, 39(21).  
 397 <https://doi.org/10.1029/2012GL053316>
- 398 Bracegirdle, T. J., Hyder, P., & Holmes, C. R. (2018). CMIP5 Diversity in Southern Westerly Jet  
 399 Projections Related to Historical Sea Ice Area: Strong Link to Strengthening and Weak Link to  
 400 Shift. *Journal of Climate*, 31(1), 195–211. <https://doi.org/10.1175/JCLI-D-17-0320.1>
- 401 Brunt, K. M., Fricker, H. A., Padman, L., Scambos, T. A., & O’Neel, S. (2010). Mapping the  
 402 grounding zone of the Ross Ice Shelf, Antarctica, using ICESat laser altimetry. *Annals of*  
 403 *Glaciology*, 51(55), 71–79. <https://doi.org/10.3189/172756410791392790>
- 404 Christianson, K., Bushuk, M., Dutrieux, P., Parizek, B. R., Joughin, I. R., Alley, R. B., et al. (2016).  
 405 Sensitivity of Pine Island Glacier to observed ocean forcing. *Geophysical Research Letters*,  
 406 43(20), 10,817–10,825. <https://doi.org/10.1002/2016GL070500>
- 407 Cook, A. J., Holland, P. R., Meredith, M. P., Murray, T., Luckman, A., & Vaughan, D. G. (2016).  
 408 Ocean forcing of glacier retreat in the western Antarctic Peninsula. *Science*, 353(6296), 283–  
 409 286.
- 410 Durand, G., F. Gillet-Chaulet, O. Gagliardini, and J. J. Fürst. (2016). SUMER Antarctic Ice-shelf  
 411 Buttressing, Version 1. Boulder, Colorado USA. NASA National Snow and Ice Data Center  
 412 Distributed Active Archive Center. <https://doi.org/10.5067/FWHORAYVZCE7>.
- 413 Fahnestock, M., Scambos, T., Moon, T., Gardner, A., Haran, T., & Klinger, M. (2016). Rapid large-  
 414 area mapping of ice flow using Landsat 8. *Remote Sensing of Environment*, 185, 84–94.  
 415 <https://doi.org/10.1016/J.RSE.2015.11.023>
- 416 Fricker, H. A., Coleman, R., Padman, L., Scambos, T. A., Bohlander, J., & Brunt, K. M. (2009).  
 417 Mapping the grounding zone of the Amery Ice Shelf, East Antarctica using InSAR, MODIS  
 418 and ICESat. *Antarctic Science*, 21(5), 515–532. <https://doi.org/10.1017/S095410200999023X>
- 419 Fürst, J. J., Durand, G., Gillet-Chaulet, F., Tavard, L., Rankl, M., Braun, M., & Gagliardini, O.  
 420 (2016). The safety band of Antarctic ice shelves. *Nature Climate Change*, 6(5), 479–482.  
 421 <https://doi.org/10.1038/nclimate2912>
- 422 Gardner, A., Fahnestock, M., & Scambos, T. A. (2020). ITS\_LIVE Regional Glacier and Ice Sheet  
 423 Surface Velocities. <https://doi.org/doi:10.5067/6II6VW8LLWJ7>

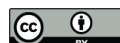

- 424 Gardner, A. S., Moholdt, G., Scambos, T., Fahnestock, M., Ligtenberg, S., van den Broeke M., &  
 425 Nilsson, J. (2018). Increased West Antarctic and unchanged East Antarctic ice discharge over  
 426 the last 7 years. *Cryosphere*, 12(2), 521–547. <https://doi.org/10.5194/TC-12-521-2018>
- 427 Greene, C. A., Blankenship, D. D., Gwyther, D. E., Silvano, A., & van Wijk, E. (2017). Wind  
 428 causes Totten Ice Shelf melt and acceleration. *Science Advances*, 3(11), e1701681–e1701681.  
 429 <https://doi.org/10.1126/sciadv.1701681>
- 430 Haran, T., J. Bohlander, T. Scambos, T. Painter, and M. Fahnestock. (2019), updated 2019. MODIS  
 431 Mosaic of Antarctica 2008-2009 (MOA2009) Image Map, Version 2. Boulder, Colorado USA.  
 432 NASA National Snow and Ice Data Center Distributed Active Archive Center. doi:  
 433 <https://doi.org/10.5067/4ZL43A4619AF>.
- 434 Hazel, J. E., & Stewart, A. L. (2019). Are the Near-Antarctic Easterly Winds Weakening in  
 435 Response to Enhancement of the Southern Annular Mode? *Source: Journal of Climate*, 32(6),  
 436 1895–1918. <https://doi.org/10.2307/26663209>
- 437 Hersbach, H., Bell, B., Berrisford, P., Hirahara, S., Horányi, A., Muñoz-Sabater, J., et al. (2020).  
 438 The ERA5 global reanalysis. *Quarterly Journal of the Royal Meteorological Society*, 146(730),  
 439 1999–2049. <https://doi.org/10.1002/QJ.3803>
- 440 Heid, T., & Kääb, A. (2012). Evaluation of existing image matching methods for deriving glacier  
 441 surface displacements globally from optical satellite imagery. *Remote Sensing of*  
 442 *Environment*, 118, 339–355. <https://doi.org/10.1016/J.RSE.2011.11.024>
- 443 Hirano, D., Tamura, T., Kusahara, K., Ohshima, K. I., Nicholls, K. W., Ushio, S., et al. (2020).  
 444 Strong ice-ocean interaction beneath Shirase Glacier Tongue in East Antarctica. *Nature*  
 445 *Communications* 2020 11:1, 11(1), 1–12. <https://doi.org/10.1038/s41467-020-17527-4>
- 446 Holland, P. R., Bracegirdle, T. J., Dutrieux, P., Jenkins, A., & Steig, E. J. (2019). West Antarctic ice  
 447 loss influenced by internal climate variability and anthropogenic forcing. *Nature Geoscience*  
 448 2019 12:9, 12(9), 718–724. <https://doi.org/10.1038/s41561-019-0420-9>
- 449 Howat, I. M., Porter, C., Smith, B. E., Noh, M. J., & Morin, P. (2019). The reference elevation  
 450 model of antarctica. *Cryosphere*, 13(2), 665–674. <https://doi.org/10.5194/TC-13-665-2019>
- 451 Jacobs, S. S., Helmer, H. H., Doake, C. S. M., Jenkins, A., & Frolich, R. M. (1992). Melting of ice  
 452 shelves and the mass balance of Antarctica. *Journal of Glaciology*, 38(130), 375–387.  
 453 <https://doi.org/10.3189/S0022143000002252>
- 454 Jenkins, A., Shoosmith, D., Dutrieux, P., Jacobs, S., Kim, T. W., Lee, S. H., et al. (2018). West  
 455 Antarctic Ice Sheet retreat in the Amundsen Sea driven by decadal oceanic variability, 11(10),  
 456 733–738. <https://doi.org/10.1038/s41561-018-0207-4>
- 457 Jezek, K. C., J. C. Curlander, F. Carsey, C. Wales, and R. G. Barry. (2013). RAMP AMM-1 SAR  
 458 Image Mosaic of Antarctica, Version 2. Boulder, Colorado USA. NASA National Snow and  
 459 Ice Data Center Distributed Active Archive Center. <https://doi.org/10.5067/8AF4ZRPULS4H>.
- 460 Kameda, T., Nakawo, M., Mae, S., Watanabe, O., & Naruse, R. (1990). Thinning of the Ice Sheet  
 461 Estimated from Total Gas Content of Ice Cores in Mizuho Plateau, East Antarctica. *Annals of*  
 462 *Glaciology*, 14, 131–135. <https://doi.org/10.3189/S0260305500008429>



- 463 Kittel, C., Amory, C., Agosta, C., Jourdain, N. C., Hofer, S., Delhasse, A., et al. (2021). Diverging  
 464 future surface mass balance between the Antarctic ice shelves and grounded ice sheet.  
 465 *Cryosphere*, 15(3), 1215–1236. <https://doi.org/10.5194/TC-15-1215-2021>
- 466 Konrad, H., Shepherd, A., Gilbert, L., Hogg, A. E., McMillan, M., Muir, A., & Slater, T. (2018).  
 467 Net retreat of Antarctic glacier grounding lines. *Nature Geoscience*, 11(4), 258–262.  
 468 <https://doi.org/10.1038/s41561-018-0082-z>
- 469 Korona, J., Berthier, E., Bernard, M., Rémy, F and Thouvenot, E (2009) ISPRS Journal of  
 470 Photogrammetry and Remote Sensing SPIRIT. SPOT 5 stereoscopic survey of Polar Ice:  
 471 reference images and topographies during the fourth International Polar Year (2007–2009).  
 472 ISPRS Journal of Photogrammetry and Remote Sensing 64(2), 204–212. doi:  
 473 10.1016/j.isprsjprs.2008.10.005.
- 474 Kusahara, K., Hirano, D., Fujii, M., D. Fraser, A., & Tamura, T. (2021). Modeling intensive ocean-  
 475 cryosphere interactions in Lützow-Holm Bay, East Antarctica. *Cryosphere*, 15(4), 1697–1717.  
 476 <https://doi.org/10.5194/TC-15-1697-2021>
- 477 Lenaerts, J. T. M., van Meijgaard, E., van den Broeke, M. R., Ligtenberg, S. R. M., Horwath, M., &  
 478 Isaksson, E. (2013). Recent snowfall anomalies in Dronning Maud Land, East Antarctica, in a  
 479 historical and future climate perspective. *Geophysical Research Letters*, 40(11), 2684–2688.  
 480 <https://doi.org/10.1002/GRL.50559>
- 481 Leprince, S., Ayoub, F., Klinger, Y., & Avouac, J.-P. (2007). *Co-Registration of Optically Sensed*  
 482 *Images and Correlation (COSI-Corr): an Operational Methodology for Ground Deformation*  
 483 *Measurements*. Igarss: 2007 IEEE International Geoscience and Remote Sensing Symposium,  
 484 1–12, 1943–1946. <https://doi.org/10.1109/Igarss.2007.4423207>
- 485 Ligtenberg, S. R. M., van de Berg, W. J., van den Broeke, M. R., Rae, J. G. L., & van Meijgaard, E.  
 486 (2013). Future surface mass balance of the Antarctic ice sheet and its influence on sea level  
 487 change, simulated by a regional atmospheric climate model. *Climate Dynamics*, 41(3–4), 867–  
 488 884. <https://doi.org/10.1007/S00382-013-1749-1>
- 489 Mae, S., & Naruse, R. (1978). Possible causes of ice sheet thinning in the Mizuho Plateau. *Nature*  
 490 1978 273:5660, 273(5660), 291–292. <https://doi.org/10.1038/273291a0>
- 491 Marshall, G. (2003). Trends in the Southern Annular Mode from observations and reanalyses. *J.*  
 492 *Clim.*, 16, 4134–4143.
- 493 Miles, B. W. J. J., Stokes, C. R., Jenkins, A., Jordan, J. R., Jamieson, S. S. R. R., & Gudmundsson,  
 494 G. H. (2020). Intermittent structural weakening and acceleration of the Thwaites Glacier  
 495 Tongue between 2000 and 2018. *Journal of Glaciology*, 1–11.  
 496 <https://doi.org/10.1017/jog.2020.20>
- 497 Moriwaki, K., & Yoshida, Y. (1983). Submarine topography of Lützow-Holm Bay, Antarctica.  
 498 *Mem. Natl. Inst. Polar Res.*, 28, 247–258.
- 499 Morlighem, M. (2020). MEaSUREs BedMachine Antarctica, Version 2. Boulder, Colorado USA.  
 500 NASA National Snow and Ice Data Center Distributed Active Archive Center. doi:  
 501 <https://doi.org/10.5067/E1QL9HFQ7A8M>.
- 502 Morlighem, M., Rignot, E., Binder, T., Blankenship, D., Drews, R., Eagles, G., et al. (2020). Deep  
 503 glacial troughs and stabilizing ridges unveiled beneath the margins of the Antarctic ice sheet.  
 504 *Nature Geoscience*, 13(2), 132–137. <https://doi.org/10.1038/s41561-019-0510-8>



- 505 Mouginit, J., Rignot, E., & Scheuchl, B. (2014). Sustained increase in ice discharge from the  
 506 Amundsen Sea Embayment, West Antarctica, from 1973 to 2013. *Geophysical Research*  
 507 *Letters*, 41(5), 1576–1584. <https://doi.org/10.1002/2013GL059069>
- 508 Nakamura, K., Doi, K., & Shibuya, K. (2007). Estimation of seasonal changes in the flow of  
 509 Shirase Glacier using JERS-1/SAR image correlation. *Polar Science*, 1(2–4), 73–83.  
 510 <https://doi.org/10.1016/J.POLAR.2007.09.002>
- 511 Nakamura, K., Doi, K., & Shibuya, K. (2010). Fluctuations in the flow velocity of the Antarctic  
 512 Shirase Glacier over an 11-year period. *Polar Science*, 4(3), 443–455.  
 513 <https://doi.org/10.1016/J.POLAR.2010.04.010>
- 514 Naruse, R. (1979). Thinning of the Ice Sheet in Mizuho Plateau, East Antarctica. *Journal of*  
 515 *Glaciology*, 24(90), 45–52. <https://doi.org/10.3189/S0022143000014635>
- 516 Nishio, F., Mae, S., Ohmae, H., Takahashi, S., Nakawo, M., & Kawada, K. (1989). Dynamical  
 517 behaviour of the ice sheet in Mizuho Plateau, East Antarctica. *Proc. NIPR Symp. Polar*  
 518 *Meteorol. Glaciol.*, 2, 97–104.
- 519 Ohshima, K. I., Takizawa, T., Ushio, S., & Kawamura, T. (1996). Seasonal variations of the  
 520 Antarctic coastal ocean in the vicinity of Lützow-Holm Bay. *Journal of Geophysical Research*  
 521 *C: Oceans*, 101(C9), 20617–20628. <https://doi.org/10.1029/96JC01752>
- 522 Pattyn, F., & Derauw, D. (2002). Ice-dynamic conditions of Shirase Glacier, Antarctica, inferred  
 523 from ERS SAR interferometry. *Journal of Glaciology*, 48(163), 559–565.  
 524 <https://doi.org/10.3189/172756502781831115>
- 525 Pattyn, F., & Naruse, R. (2003). The nature of complex ice flow in Shirase Glacier catchment, East  
 526 Antarctica. *Journal of Glaciology*, 49(166), 429–436.  
 527 <https://doi.org/10.3189/172756503781830610>
- 528 Perren, B. B., Hodgson, D. A., Roberts, S. J., Sime, L., van Nieuwenhuyze, W., Verleyen, E., &  
 529 Vyverman, W. (2020). Southward migration of the Southern Hemisphere westerly winds  
 530 corresponds with warming climate over centennial timescales. *Communications Earth &*  
 531 *Environment* 2020 1:1, 1(1), 1–8. <https://doi.org/10.1038/s43247-020-00059-6>
- 532 Reese, R., Gudmundsson, G. H., Levermann, A., & Winkelmann, R. (2018). The far reach of ice-  
 533 shelf thinning in Antarctica. *Nature Climate Change*, 8(1), 53–57.  
 534 <https://doi.org/10.1038/s41558-017-0020-x>
- 535 Rignot, E., Mouginit, J., Scheuchl, B., van den Broeke, M., van Wessem, M. J., & Morlighem, M.  
 536 (2019, January 22). Four decades of Antarctic ice sheet mass balance from 1979–2017.  
 537 *Proceedings of the National Academy of Sciences of the United States of America*. National  
 538 Academy of Sciences. <https://doi.org/10.1073/pnas.1812883116>
- 539 Rintoul, S. R., Silvano, A., Pena-Molino, B., van Wijk, E., Rosenberg, M., Greenbaum, J. S., &  
 540 Blankenship, D. D. (2016). Ocean heat drives rapid basal melt of the Totten ice shelf. *Science*  
 541 *Advances*, 2(12). <https://doi.org/10.1126/sciadv.1601610>
- 542 Scambos, T., Fahnestock, M., Moon, T., Gardner, A., & Klinger, M. (2016). Global Land Ice  
 543 Velocity Extraction from Landsat 8 (GoLIVE). Boulder, Colorado USA. NSIDC: National  
 544 Snow and Ice Data Center.



- 545 Scambos, T. A., Haran, T. M., Fahnestock, M. A., Painter, T. H., & Bohlander, J. (2007). MODIS-  
546 based Mosaic of Antarctica (MOA) data sets: Continent-wide surface morphology and snow  
547 grain size. *Remote Sensing of Environment*, 111(2), 242–257.  
548 <https://doi.org/10.1016/J.RSE.2006.12.020>
- 549 Scherler, D., Leprince, S., & Strecker, M. R. (2008). Glacier-surface velocities in alpine terrain  
550 from optical satellite imagery—Accuracy improvement and quality assessment. *Remote*  
551 *Sensing of Environment*, 112(10), 3806–3819. <https://doi.org/10.1016/J.RSE.2008.05.018>
- 552 Schröder, L., Horwath, M., Dietrich, R., & Helm, V. (2019). Four decades of surface elevation  
553 change of the Antarctic Ice Sheet from multi-mission satellite altimetry. *The Cryosphere*, 13,  
554 427–449, <https://doi.org/10.5194/tc-13-427-2019>
- 555 Smith, B., Fricker, H. A., Gardner, A. S., Medley, B., Nilsson, J., Paolo, F. S., Nicholas Holschuh,  
556 et al. (2020). Pervasive ice sheet mass loss reflects competing ocean and atmosphere processes.  
557 *Science*, 368(6496), 1239–1242.
- 558 Sproson, A. D., Takano, Y., Miyairi, Y., Aze, T., Matsuzaki, H., Ohkouchi, N., & Yokoyama, Y.  
559 (2021). Beryllium isotopes in sediments from Lake Maruwan Oike and Lake Skallen, East  
560 Antarctica, reveal substantial glacial discharge during the late Holocene. *Quaternary Science*  
561 *Reviews*, 256, 106841. <https://doi.org/10.1016/J.QUASCIREV.2021.106841>
- 562 Thoma, M., Jenkins, A., Holland, D., & Jacobs, S. (2008). Modelling Circumpolar Deep Water  
563 intrusions on the Amundsen Sea continental shelf, Antarctica. *Geophysical Research Letters*,  
564 35(18). <https://doi.org/10.1029/2008GL034939>
- 565 Thompson, D. W. J., & Solomon, S. (2002). Interpretation of recent Southern Hemisphere climate  
566 change. *Science*, 296(5569), 895–899. <https://doi.org/10.1126/science.1069270>
- 567 Thompson, D. W. J., Solomon, S., Kushner, P. J., England, M. H., Grise, K. M., & Karoly, D. J.  
568 (2011). Signatures of the Antarctic ozone hole in Southern Hemisphere surface climate change.  
569 *Nature Geoscience* 2011 4:11, 4(11), 741–749. <https://doi.org/10.1038/ngeo1296>
- 570 Toh, H. and Shibuya, K. (1992). Thinning rate of ice sheet on Mizuho Plateau, East Antarctica,  
571 determined by GPS differential positioning. In Yoshida, Y., Kaminuma, K. and Shiraishi, K.,  
572 eds. Recent progress in Antarctic earth sciences. Tokyo, Terra Scientific Publishing Co., 579–  
573 583.
- 574 Turner, J., Colwell, S. R., Marshall, G. J., Lachlan-Cope, T. A., Carleton, A. M., Jones, P. D.,  
575 Lagun, V., Reid, P. A., & Iagovkina, S. (2004). The SCAR READER Project: Toward a High-  
576 Quality Database of Mean Antarctic Meteorological Observations, *Journal of Climate*, 17(14),  
577 2890–2898.
- 578 Turner, J. (2005). Antarctic climate change during the last 50 years. *Int. J. Climatol.*, 25, 279–294.
- 579 Wang, G., Cai, W., & Purich, A. (2014). Trends in Southern Hemisphere wind-driven circulation in  
580 CMIP5 models over the 21st century: Ozone recovery versus greenhouse forcing. *Journal of*  
581 *Geophysical Research: Oceans*, 119(5), 2974–2986. <https://doi.org/10.1002/2013JC009589>
- 582 Yin, J. H. (2005). A consistent poleward shift of the storm tracks in simulations of 21st century  
583 climate. *Geophys. Res. Lett.*, 32(18), L18701. <https://doi.org/10.1029/2005gl023684>
- 584
