# Supplementary figures and images for: Slowdown of Shirase Glacier caused by strengthening alongshore winds
Source: Copernicus journal article supplement (doi:10.5194/tc-2022-126), 2022-07-04

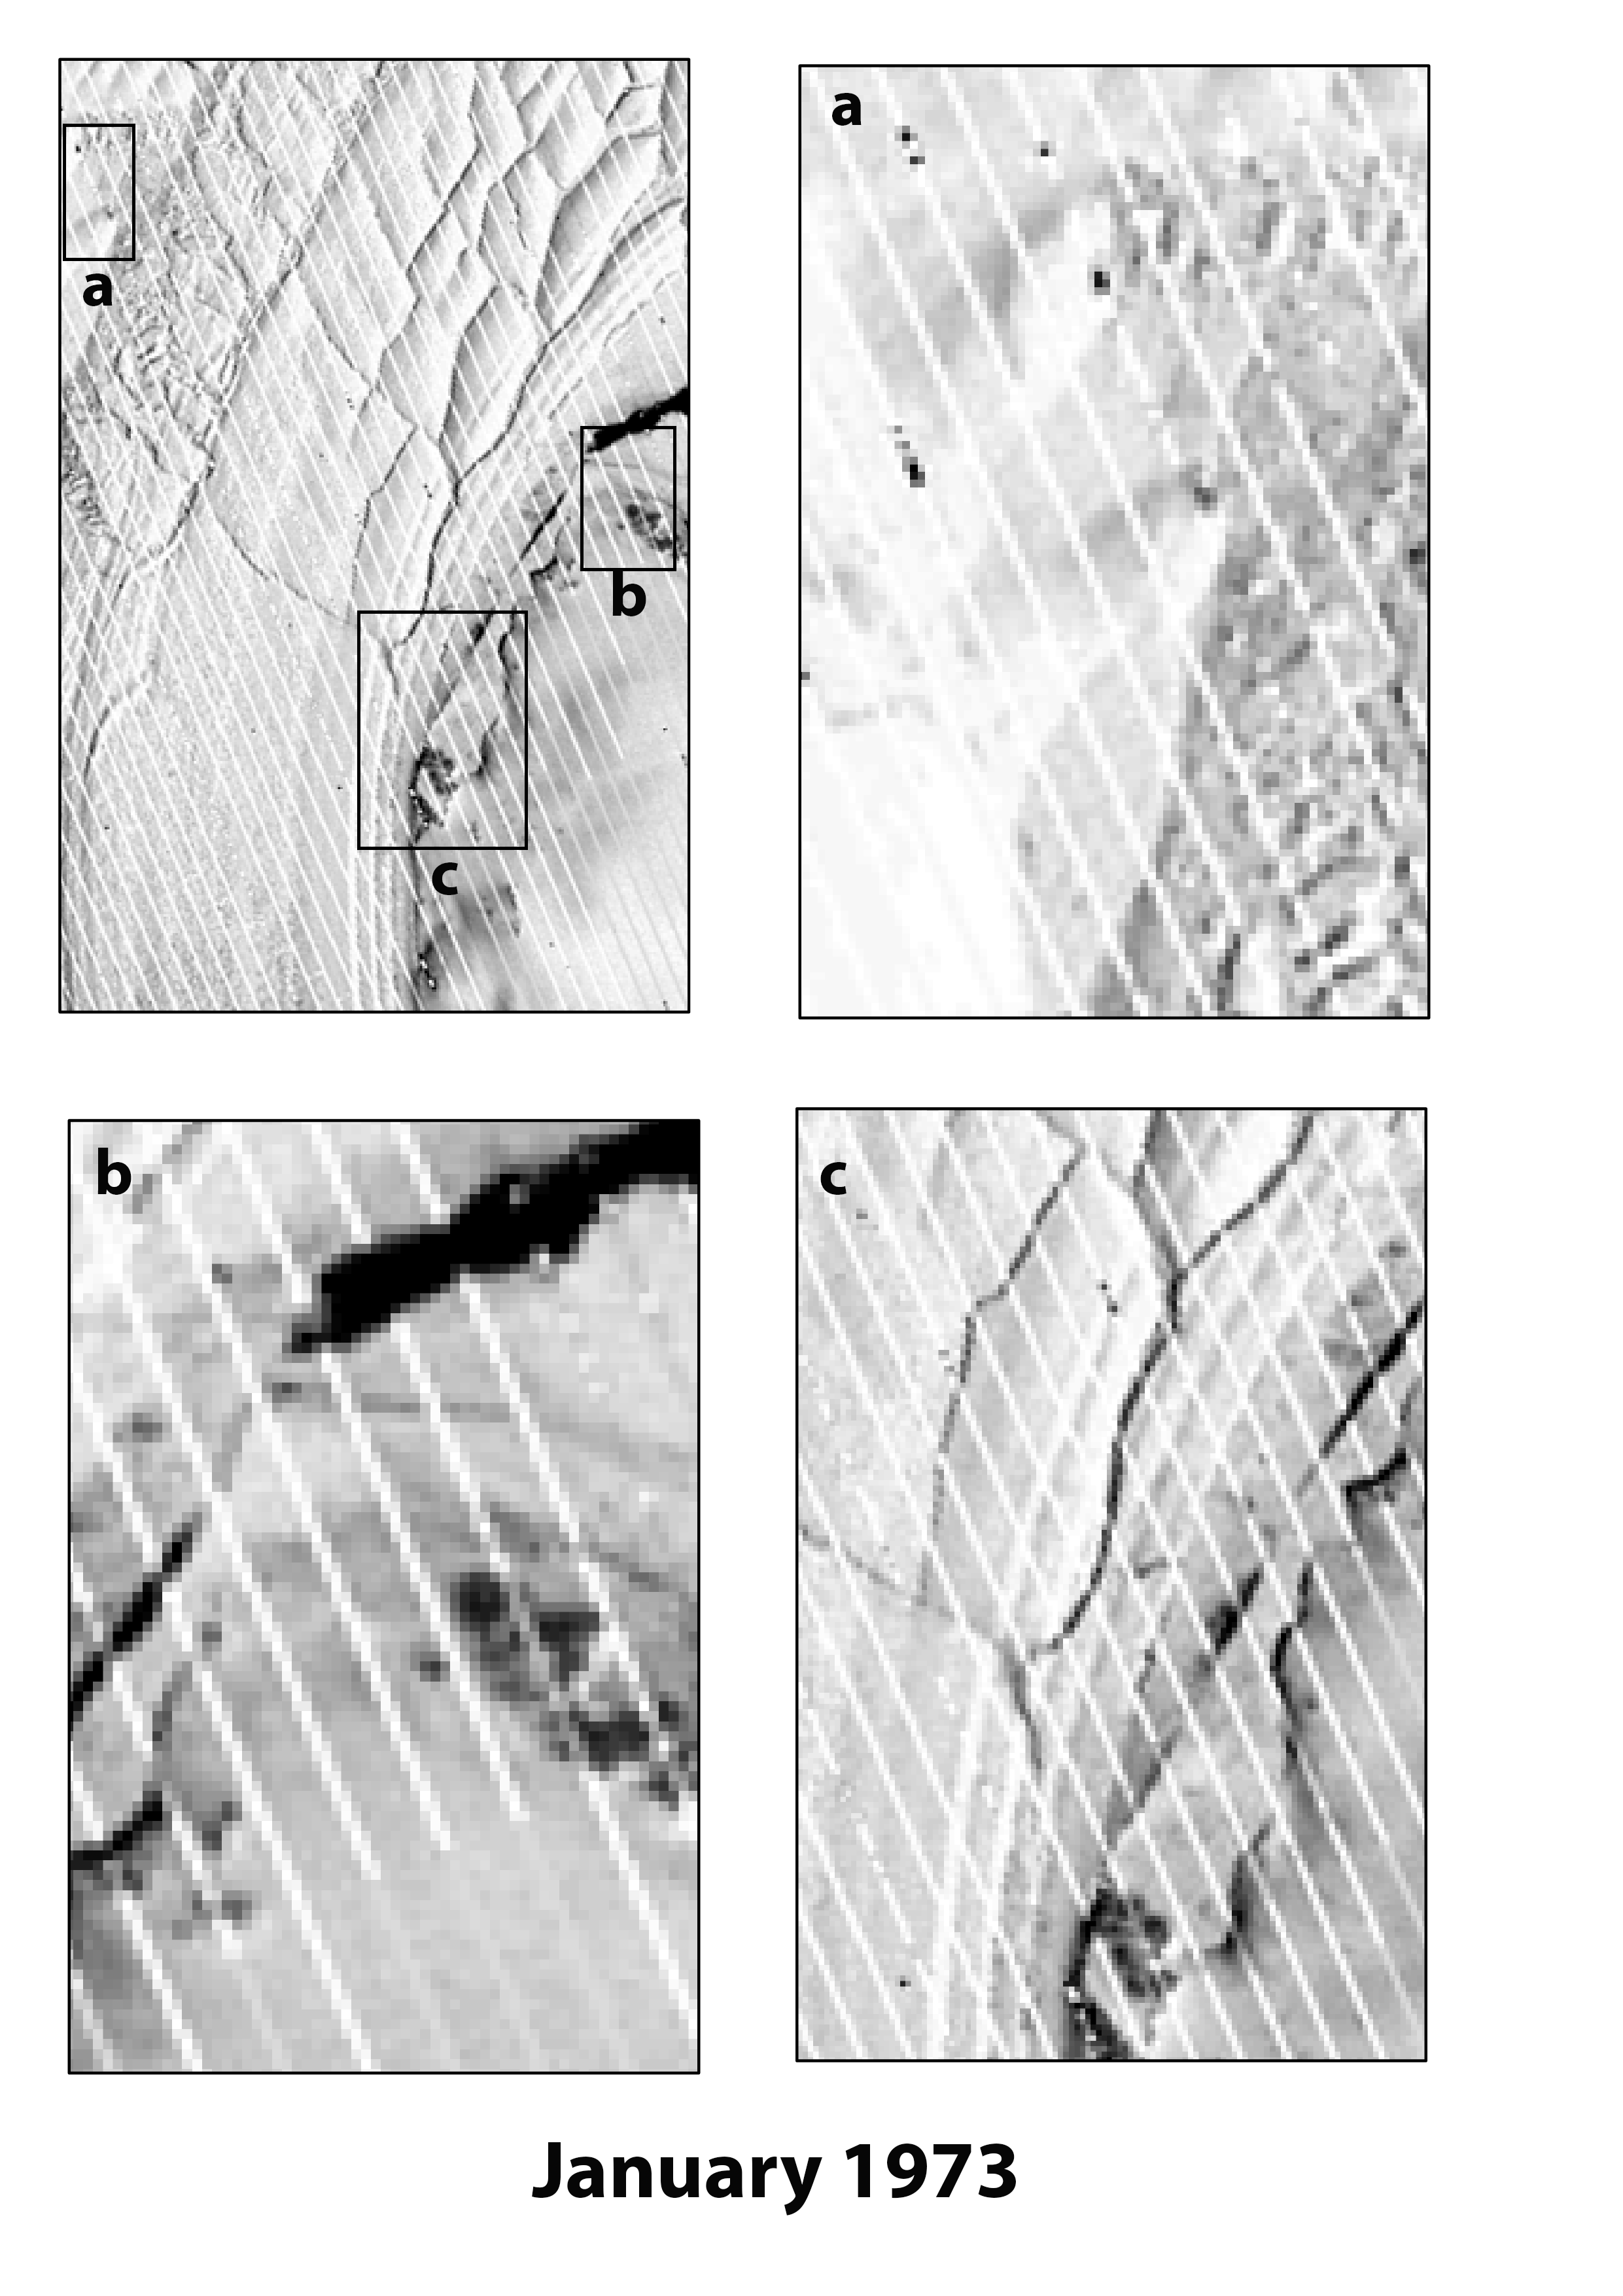

Supplement: Supplementary file 1 [file tc-2022-126-supplement.zip › SupplementaryInformation/AnimationS1.gif]

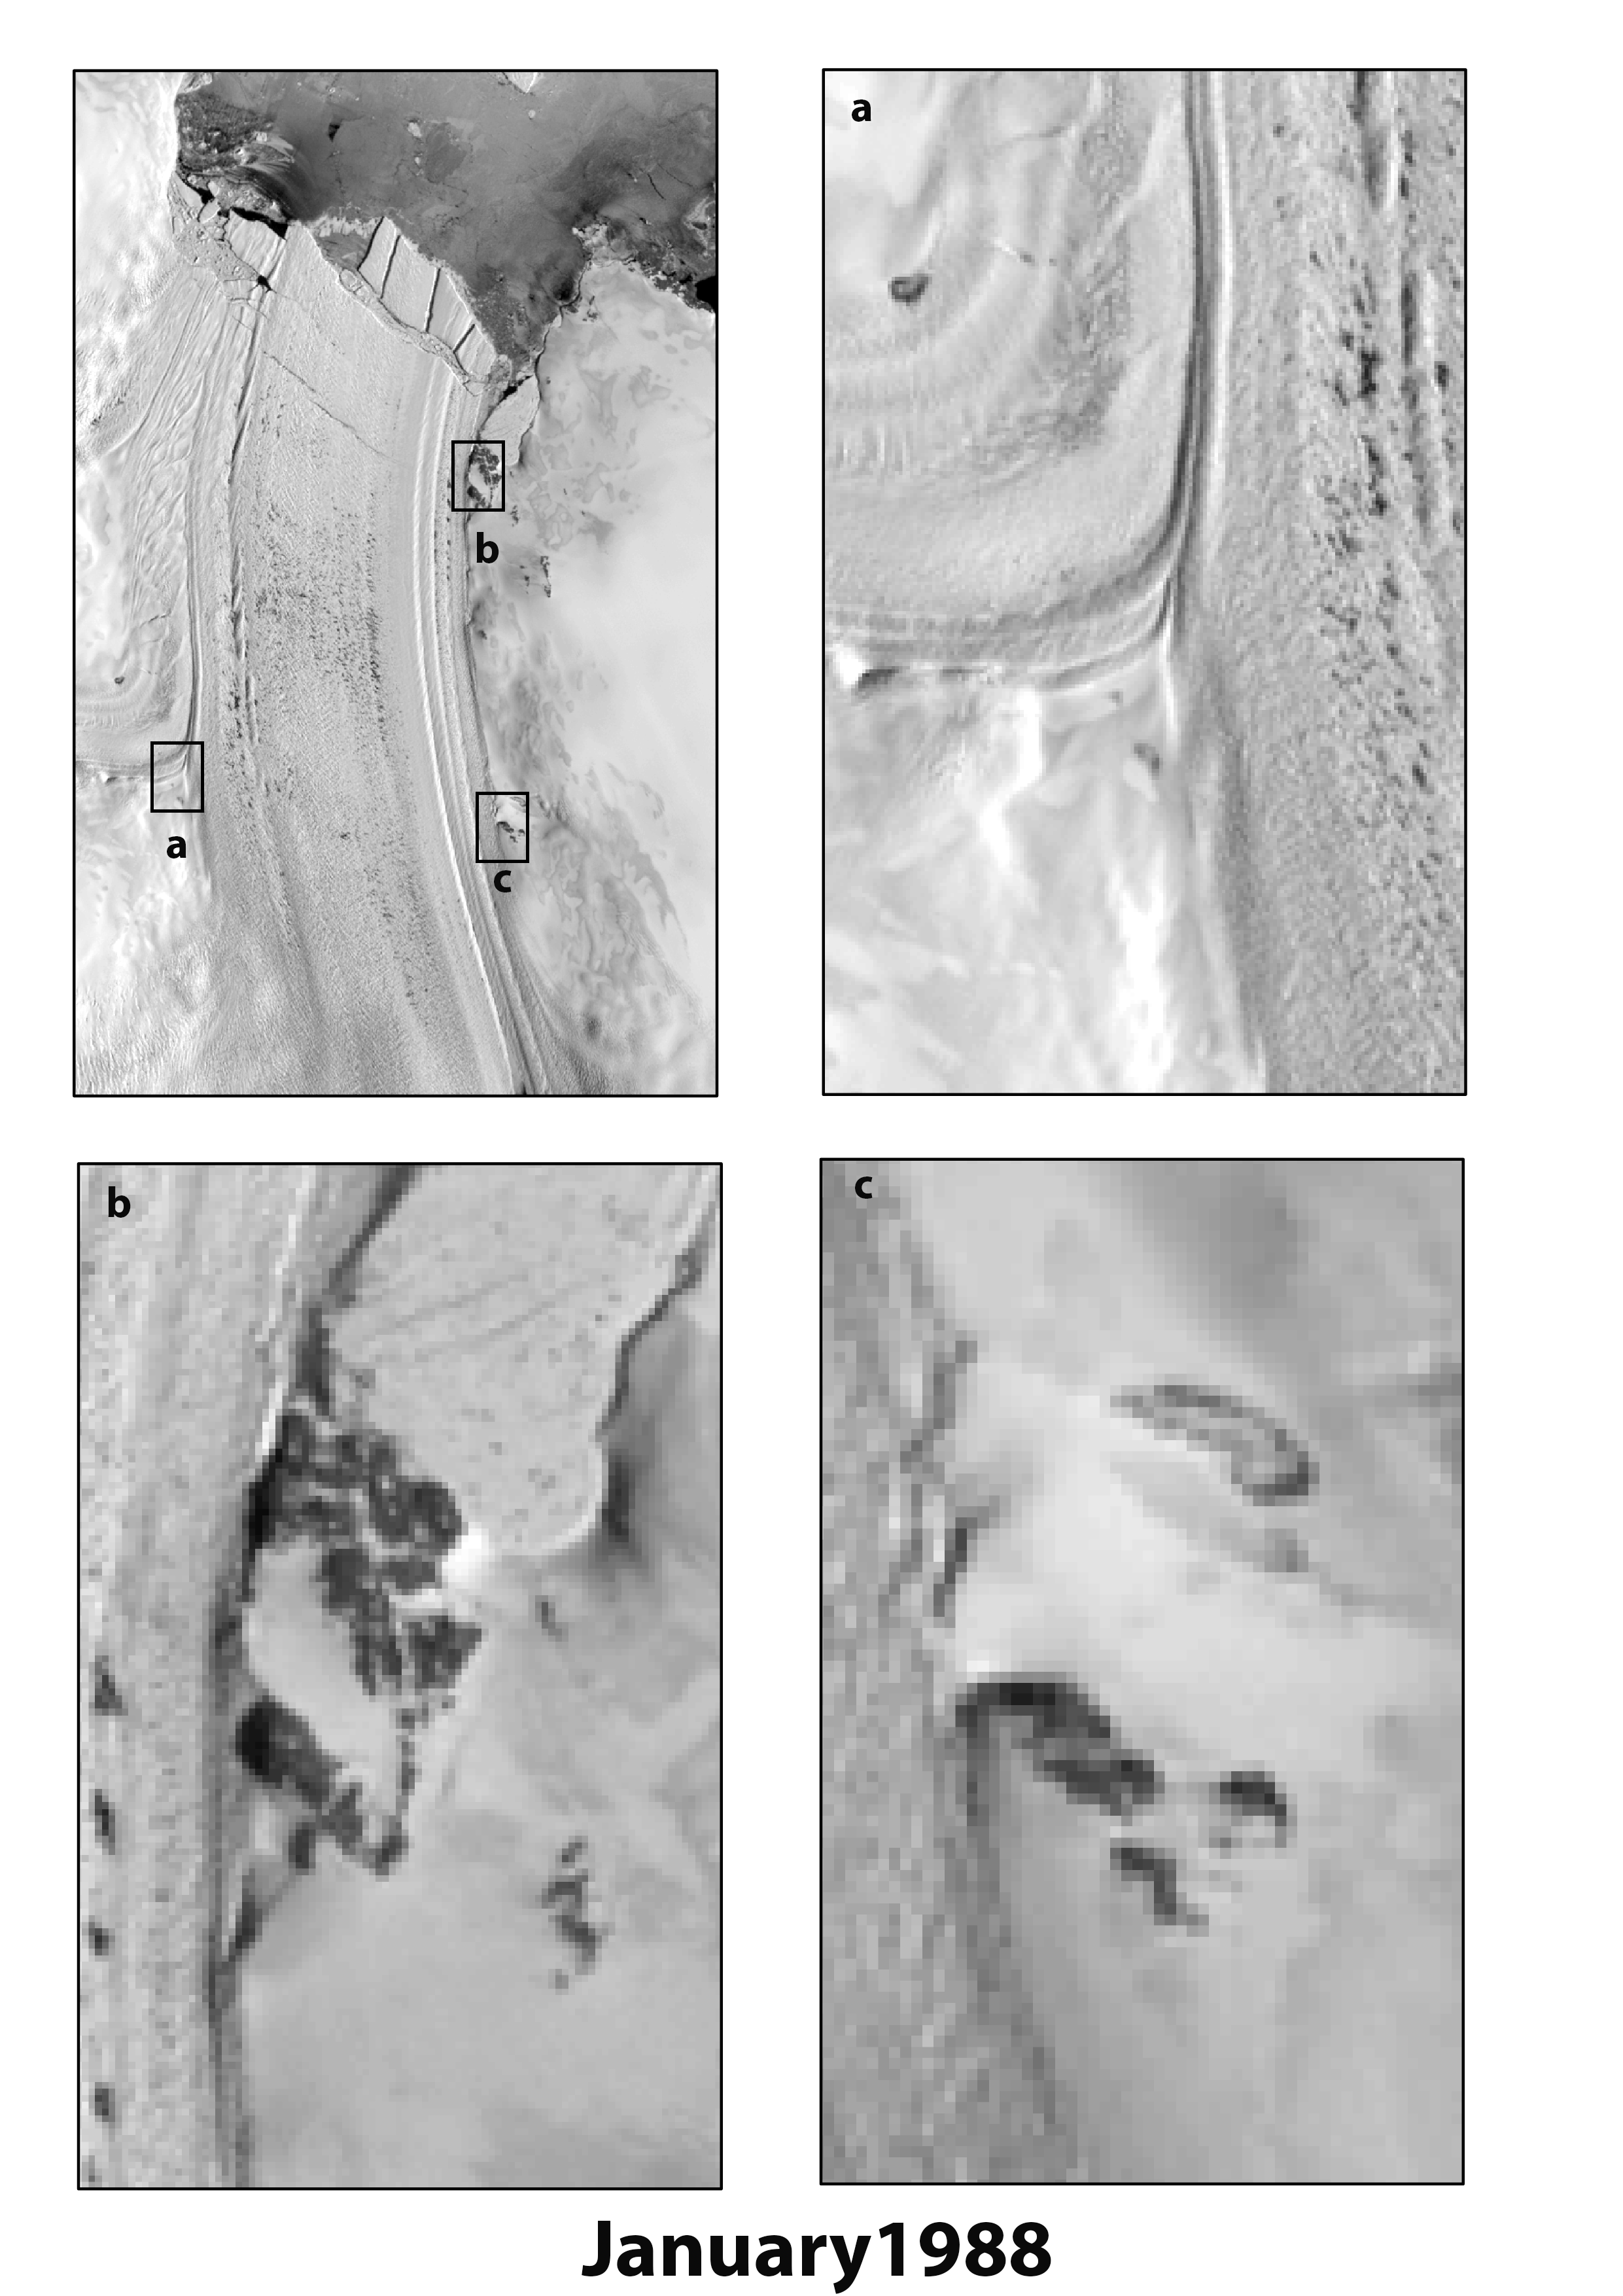

Supplement: Supplementary file 1 [file tc-2022-126-supplement.zip › SupplementaryInformation/AnimationS2.gif]

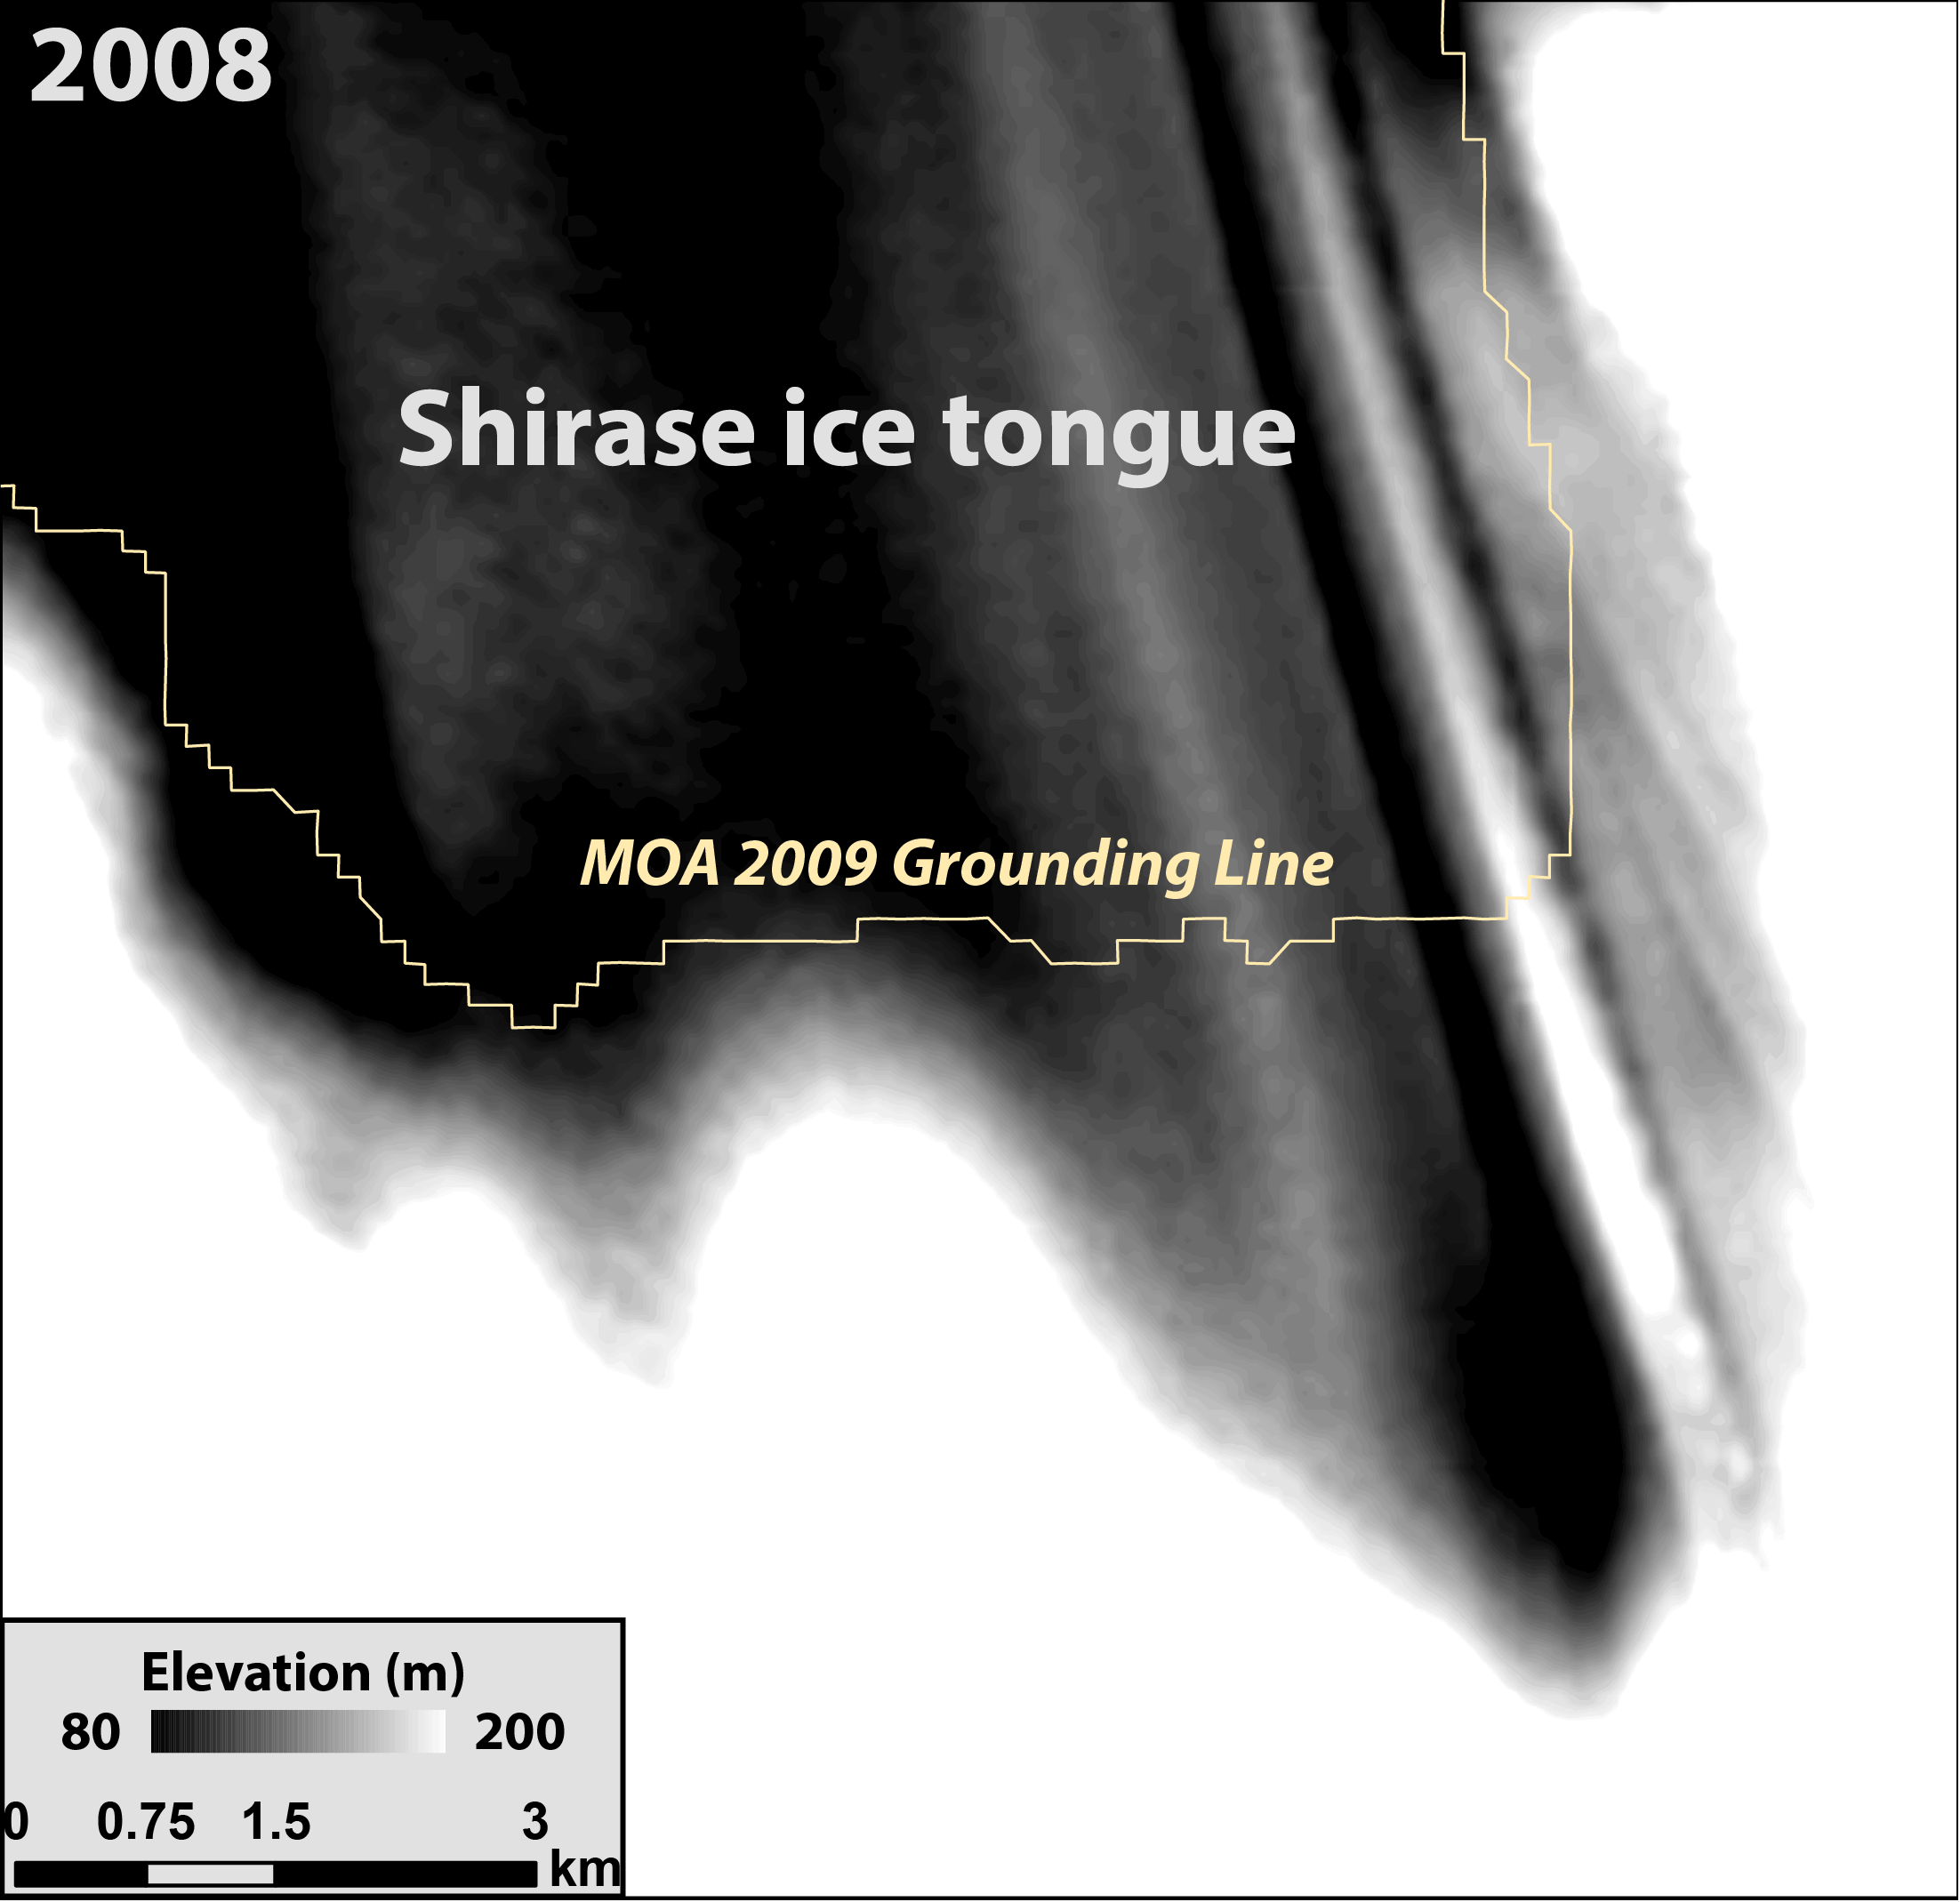

Supplement: Supplementary file 1 [file tc-2022-126-supplement.zip › SupplementaryInformation/AnimationS3.gif]
